# Supplementary material
Source: publisher figshare collection journal article supplement (https://tandf.figshare.com/ndownloader/files/34467646)
Supplement: Supplementary file 1 [file 34467646]

## SUPPLEMENTAL MATERIAL

SM Table 1: Treatments, replication, and planting containers for experiments (Exp) 1 and 2 in different seasons.

| Species           | Exp | Season | Treatment          |                  |             |                | Reps<br>per<br>treat <sup>2</sup> | Pots<br>per<br>treat <sup>3</sup> | Cuttings<br>per<br>species | Pot size<br>(cm) |
|-------------------|-----|--------|--------------------|------------------|-------------|----------------|-----------------------------------|-----------------------------------|----------------------------|------------------|
| <i>Salix</i> ssp. | 1   | Summer | Soak (d)           | IBA (%)          | Salix water | Smoke water    | 3                                 | 1                                 | 54                         | 10x10x10         |
|                   | 1   | Fall   | 0, 1, 3, 5, 10, 20 | 0, 0.1, 0.8      |             |                | 6                                 | 2                                 | 144                        | 10x10x10         |
|                   | 1   | Spring | 0, 1, 3, 5, 10, 20 | 0, 0.1, 0.4, 0.8 |             |                | 9                                 | 3                                 | 216                        | 10x10x10         |
|                   | 2   | Fall   | 0, 1, 3, 5, 10, 20 | 0, 0.1, 0.4, 0.8 | 0.5, 1, 2   | 0.05, 0.1, 0.5 | 10                                | 10                                | 100                        | 10x3x3           |

<sup>1</sup> Number of replicate cuttings per treatment

<sup>2</sup> Number of pots per treatment

SM Table 2: Summary statistics for maximum (max) and mean number of roots and longest root length for *Salix* ssp. cuttings in experiments (Exp) 1 and 2 at different times of year. SE = standard error. NR = no roots.

| Species           | Exp | Season | Percent<br>rooting $\pm$ SE | Max #<br>roots | Mean # roots (all<br>cuttings) $\pm$ SE | Mean # roots (rooted<br>cuttings) $\pm$ SE | Max length<br>(cm) | Mean length<br>(cm) $\pm$ SE | n<br>rooted | n<br>planted |
|-------------------|-----|--------|-----------------------------|----------------|-----------------------------------------|--------------------------------------------|--------------------|------------------------------|-------------|--------------|
| <i>Salix</i> ssp. | 1   | Summer | 29.6 (0.1)                  | 9              | 0.9 (0.3)                               | 3.1 (0.6)                                  | 55.5               | 13.5 (4.6)                   | 16          | 54           |
|                   |     | Fall   | 83.3 (0.0)                  | 80             | 8.1 (0.8)                               | 9.7 9 (0.9)                                | 45.6               | 19.9 (1.0)                   | 120         | 144          |
|                   |     | Spring | 88.0 (0.0)                  | 52             | 10.5 (0.6)                              | 11.9 (0.6)                                 | 41.0               | 17.0 (0.6)                   | 190         | 216          |
|                   | 2   | Fall   | 93.9 (0.0)                  | 30             | 9.9 (0.7)                               | 10.5 (0.7)                                 | 42.4               | 23.0 (0.9)                   | 93          | 100          |

SM Table 3: Number of roots and longest root length for *Salix* ssp. cuttings separated by treatment (IBA concentration (%), soaking time (day), *Salix* water extract, smoke water extract) in fall and spring in experiments 1 and 2. Maximum (max) and minimum (min) number of roots and length of roots on second line in brackets.

| Treatment           | Number roots $\pm$ SE<br>(max/min) |                          | Length longest root (cm) $\pm$ SE<br>(max/min) |                              | N    |        |
|---------------------|------------------------------------|--------------------------|------------------------------------------------|------------------------------|------|--------|
| <u>Experiment 1</u> |                                    |                          |                                                |                              |      |        |
|                     | Fall                               | Spring                   | Fall                                           | Spring                       | Fall | Spring |
| IBA %               |                                    |                          |                                                |                              |      |        |
| 0                   | 6.1 $\pm$ 1.1<br>(18/1)            | 8.9 $\pm$ 0.7<br>(20/1)  | 21.3 $\pm$ 2.5<br>(42.0/0.1)                   | 18.5 $\pm$ 1.2<br>(33.7/0.6) | 28   | 47     |
| 0.1                 | 7.7 $\pm$ 1.0<br>(21/1)            | 10.8 $\pm$ 0.9<br>(25/1) | 20.0 $\pm$ 1.7<br>(38.0/ 0.1)                  | 17.8 $\pm$ 1.2<br>(41.0/0.6) | 32   | 46     |
| 0.4                 | 9.5 $\pm$ 1.2<br>(30/1)            | 14.9 $\pm$ 1.2<br>(44/2) | 19.0 $\pm$ 2.4<br>(45.6/2.5)                   | 16.4 $\pm$ 1.2<br>(33.0/1.3) | 28   | 49     |
| 0.8                 | 12.9 $\pm$ 1.5<br>(32/1)           | 13.0 $\pm$ 1.6<br>(52/1) | 19.3 $\pm$ 1.7<br>(34.5/2.5)                   | 15.3 $\pm$<br>(32.0/1.8)     | 31   | 48     |
| Soaking (day)       |                                    |                          |                                                |                              |      |        |
| 0                   | 11.2 $\pm$ 1.9<br>(30/1)           | 10.1 $\pm$ 1.1<br>(27/1) | 22.6 $\pm$ 2.9<br>(45.0/0.6)                   | 14.9 $\pm$ 1.3<br>(29.5/0.6) | 18   | 33     |
| 1                   | 9.1 $\pm$ 1.5<br>(25/1)            | 8.9 $\pm$ 1.1<br>(22/2)  | 23.1 $\pm$ 2.4<br>(45.6/0.1)                   | 14.5 $\pm$ 1.5<br>(32.0/0.6) | 21   | 31     |
| 3                   | 6.7 $\pm$ 1.5<br>(20/1)            | 9.6 $\pm$ 1.0<br>(24/1)  | 17.3 $\pm$ 3.3<br>(42.0/0.1)                   | 15.9 $\pm$ 1.4<br>(31/0.8)   | 17   | 30     |
| 5                   | 10.6 $\pm$ 1.4<br>(30/2)           | 14.1 $\pm$ 1.5<br>(44/2) | 17.7 $\pm$ 2.3<br>(43.3/2.5)                   | 16.9 $\pm$ 1.2<br>(31.5/2.9) | 21   | 34     |
| 10                  | 8.4 $\pm$ 1.7<br>(28/1)            | 15.0 $\pm$ 2.0<br>(52/3) | 20.6 $\pm$ 2.4<br>(40.4/4.8)                   | 22.0 $\pm$ 1.4<br>(33.0/6.6) | 20   | 31     |
| 20                  | 8.6 $\pm$ 1.7<br>(32/2)            | 13.8 $\pm$ 1.5<br>(33/1) | 17.9 $\pm$ 1.9<br>(31.6/2.9)                   | 17.8 $\pm$ 1.9<br>(41.0/2.3) | 22   | 31     |
| <u>Experiment 2</u> |                                    |                          |                                                |                              |      |        |
| Control             | 12.7 $\pm$ 2.0<br>(23/3)           |                          | 23.8 $\pm$ 2.2<br>(36.3/14.2)                  |                              | 9    |        |
| IBA                 |                                    |                          |                                                |                              |      |        |
| 0.1                 | 9.0 $\pm$ 1.9<br>(18/2)            |                          | 17.5 $\pm$ 3.1<br>(33.8/2.9)                   |                              | 9    |        |
| 0.4                 | 14.0 $\pm$ 2.1<br>(28/7)           |                          | 25.5 $\pm$ 2.0<br>(37.2/19.0)                  |                              | 9    |        |
| 0.8                 | 13.8 $\pm$ 2.7<br>(30/6)           |                          | 23.0 $\pm$ 2.7<br>(41.8/11.5)                  |                              | 10   |        |
| Salix water         |                                    |                          |                                                |                              |      |        |
| 0.5                 | 7.9 $\pm$ 1.1<br>(12/3)            |                          | 19.2 $\pm$ 3.8<br>(42.1/4.0)                   |                              | 10   |        |
| 1                   | 6.9 $\pm$ 1.9<br>(22/1)            |                          | 26.2 $\pm$ 3.1<br>(40.8/8.9)                   |                              | 10   |        |
| 2                   | 7.9 $\pm$ 1.6<br>(16/4)            |                          | 26.2 $\pm$ 4.9<br>(42.4/2.2)                   |                              | 7    |        |
| Smoke water         |                                    |                          |                                                |                              |      |        |
| 0.05                | 12.5 $\pm$ 1.9<br>(23/5)           |                          | 20.1 $\pm$ 2.1<br>(33.0/11.3)                  |                              | 10   |        |
| 0.1                 | 13.4 $\pm$ 2.5<br>(24/5)           |                          | 30.7 $\pm$ 2.1<br>(38.0/20.2)                  |                              | 9    |        |
| 0.5                 | 7.5 $\pm$ 1.7<br>(19/2)            |                          | 19.6 $\pm$ 1.9<br>(28.5/12.9)                  |                              | 10   |        |

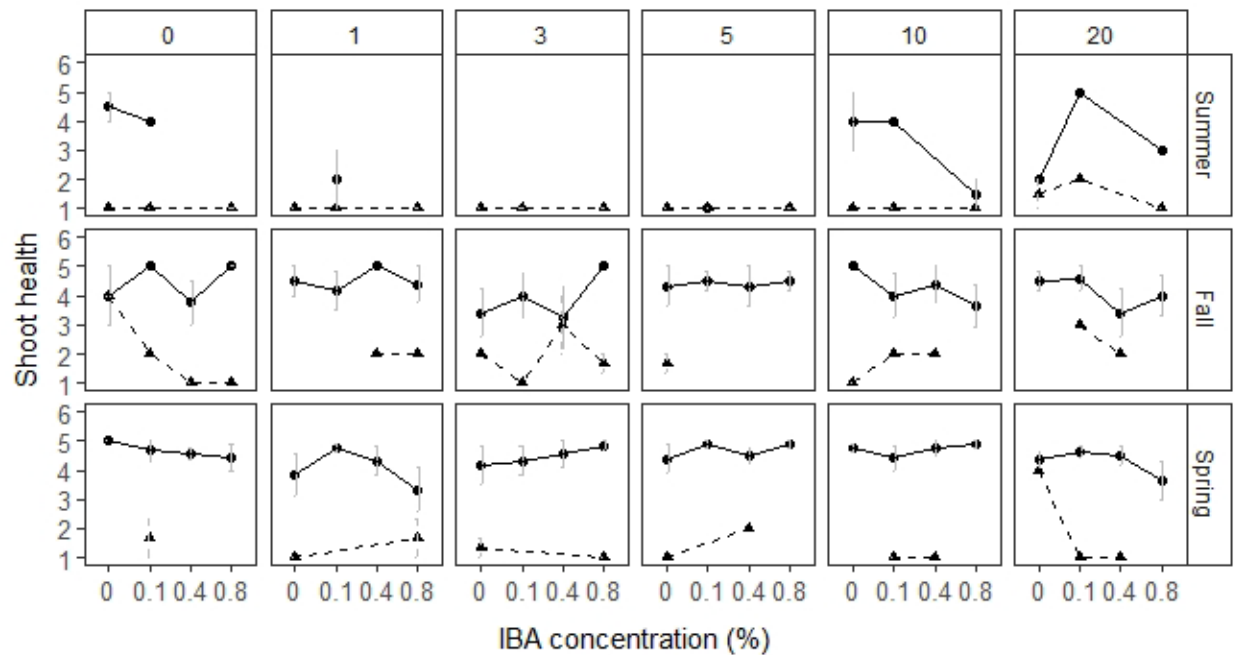

SM Figure 1: Shoot health at day 60 for *Salix* ssp. cuttings in experiment 1 that rooted (circle, solid line) and did not root (triangle, dashed line) by IBA concentration (%) (x-axis), season (horizontal panels), and soaking time (days) (vertical panels) with standard error of the mean. There were  $n = 3$  (summer),  $n = 6$  (fall), and  $n = 9$  (spring) cuttings for each soaking x IBA treatment. Shapes without error bars represent a single cutting.

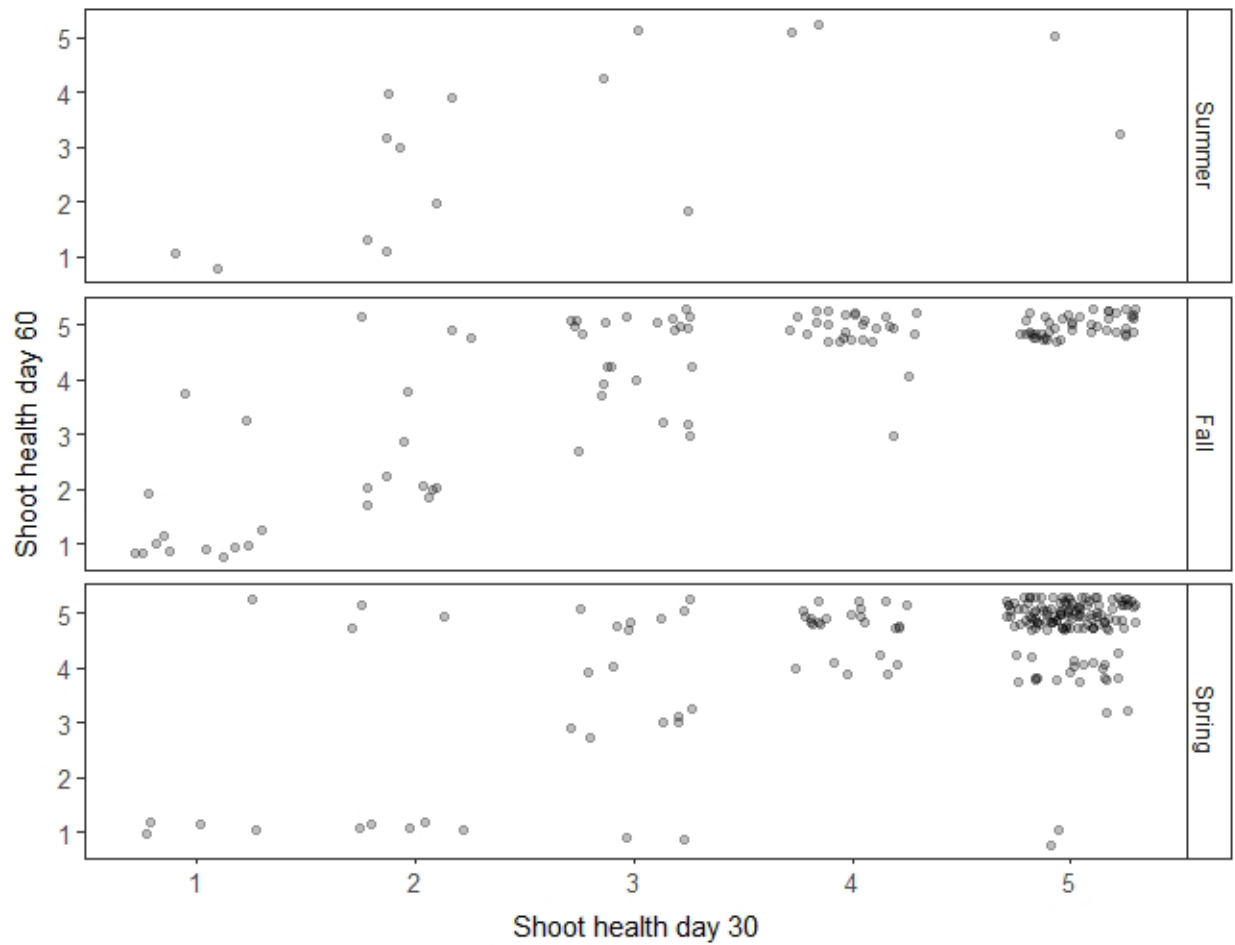

SM Figure 2: Jitter plot for correlation between shoot health at day 60 and shoot health at day 30 for rooted *Salix* ssp. cuttings in summer, fall, and spring in experiment 1. Each point in a jitter plot had a small value (between 0 and 0.3) added to both values on x and y axes to visually separate points.

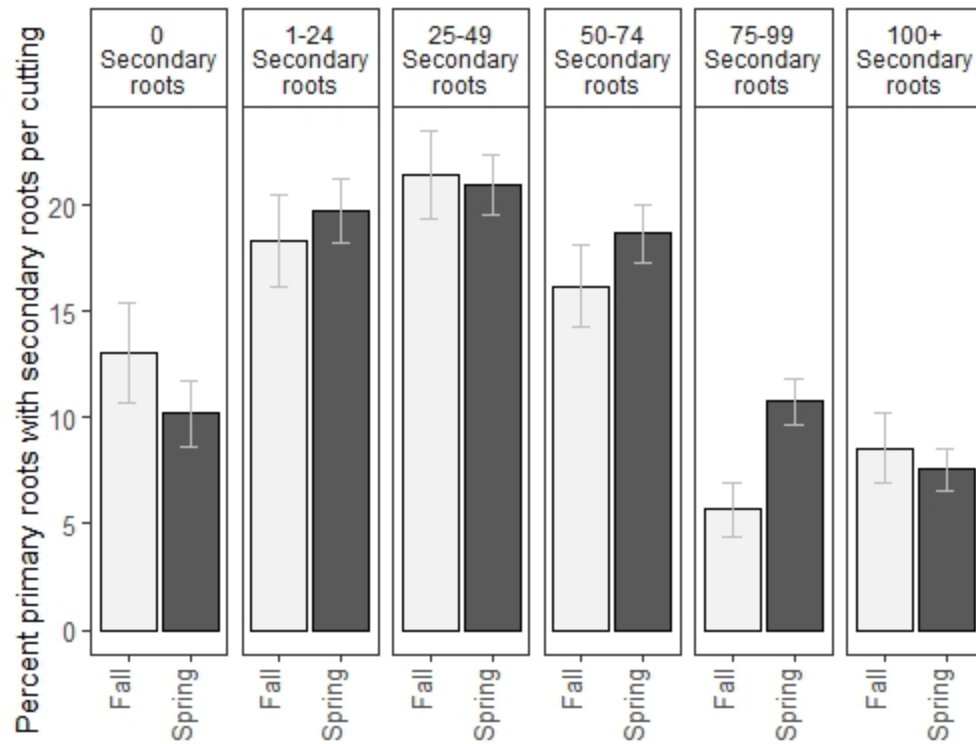

SM Figure 3: Percent of *Salix* ssp. cuttings with standard error in experiment 1 with secondary roots in different categories (vertical panels) in different seasons (x-axis). Fall bars are n = 120, spring bars are n = 190.

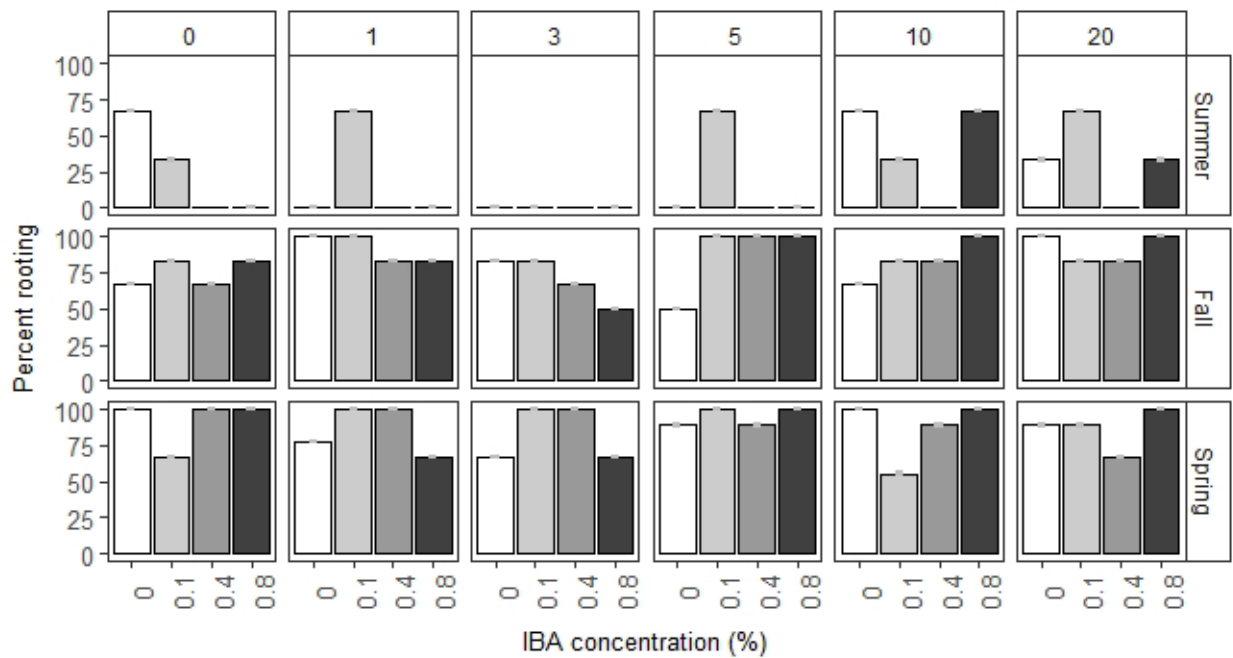

SM Figure 4: Percentage of rooted *Salix* ssp. cuttings with standard error in experiment 1 by soaking time (vertical panels, 0, 1, 3, 5, 10, 20 days), IBA concentration (0, 0.1, 0.4, 0.8 % IBA) and at different times of year (horizontal panels) Summer cuttings received three IBA concentrations (0, 0.1, 0.8 % IBA). Each bar is n = 3 (summer), n = 6 (fall), and n = 9 (spring).

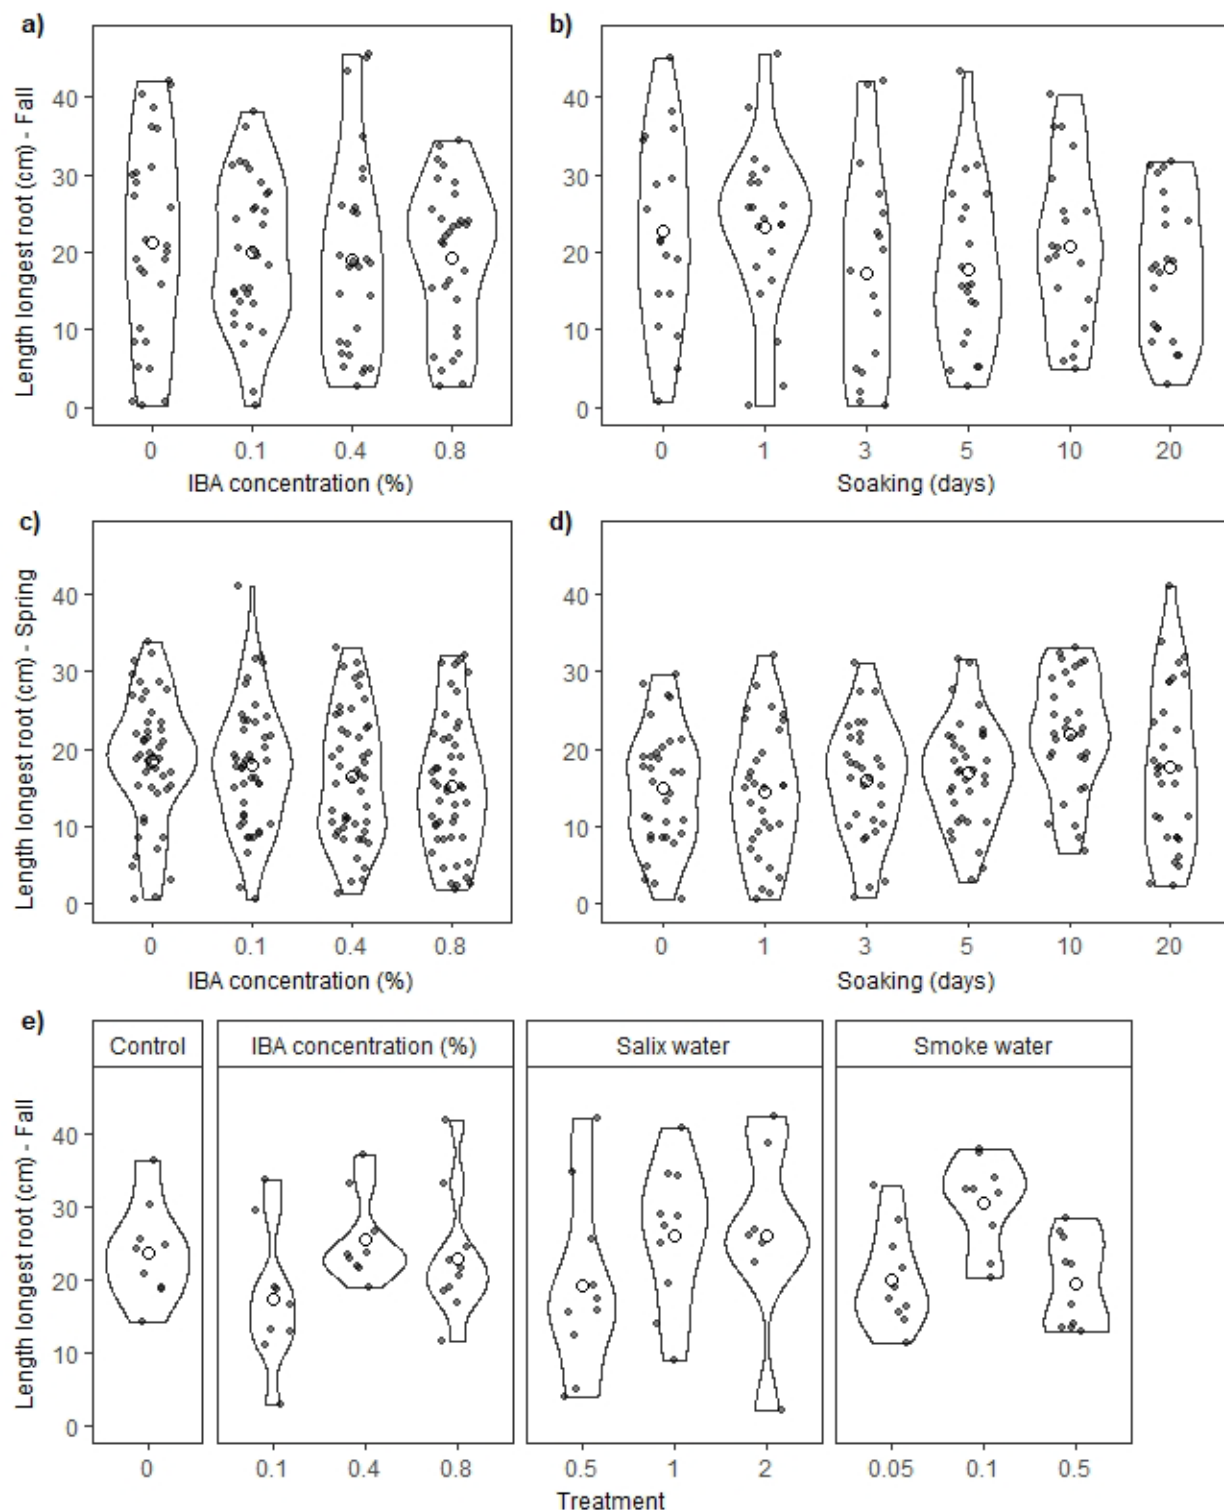

SM Figure 5: Violin and jitter plots for longest root length (cm) in fall (a, b, e) and spring (c, d) on rooted *Salix* ssp. cuttings from experiment 1 for IBA concentration (%) (a, c), soaking time (days) (b, d), and from experiment 2 by treatment (e). Closed circles represent individual roots, open circles represent treatment means. Each closed circle in the jitter plot had a small value (between 0 and 0.2) added to the value on the x axis to visually separate points. Black lines for each violin plot use density curves to show the data distribution, with wider areas having a higher frequency of data points than narrower areas.

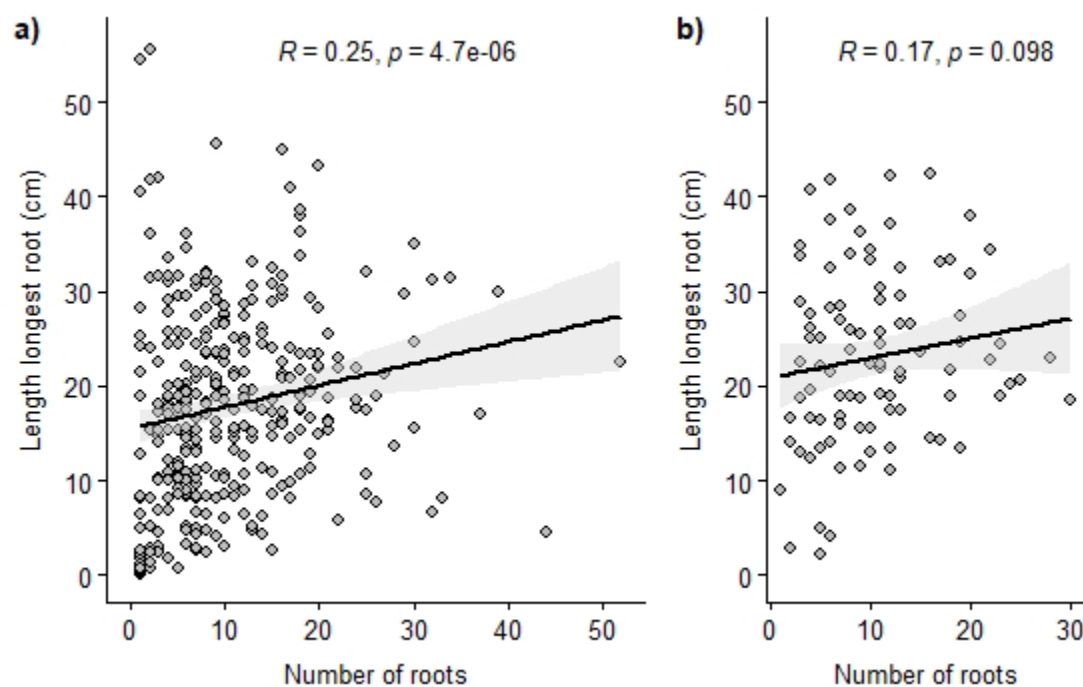

SM Figure 6: Correlation between number of roots and longest root length for rooted *Salix* ssp. cuttings in experiment 1 a) ( $n = 326$ ) and experiment 2 b) ( $n = 100$ ).



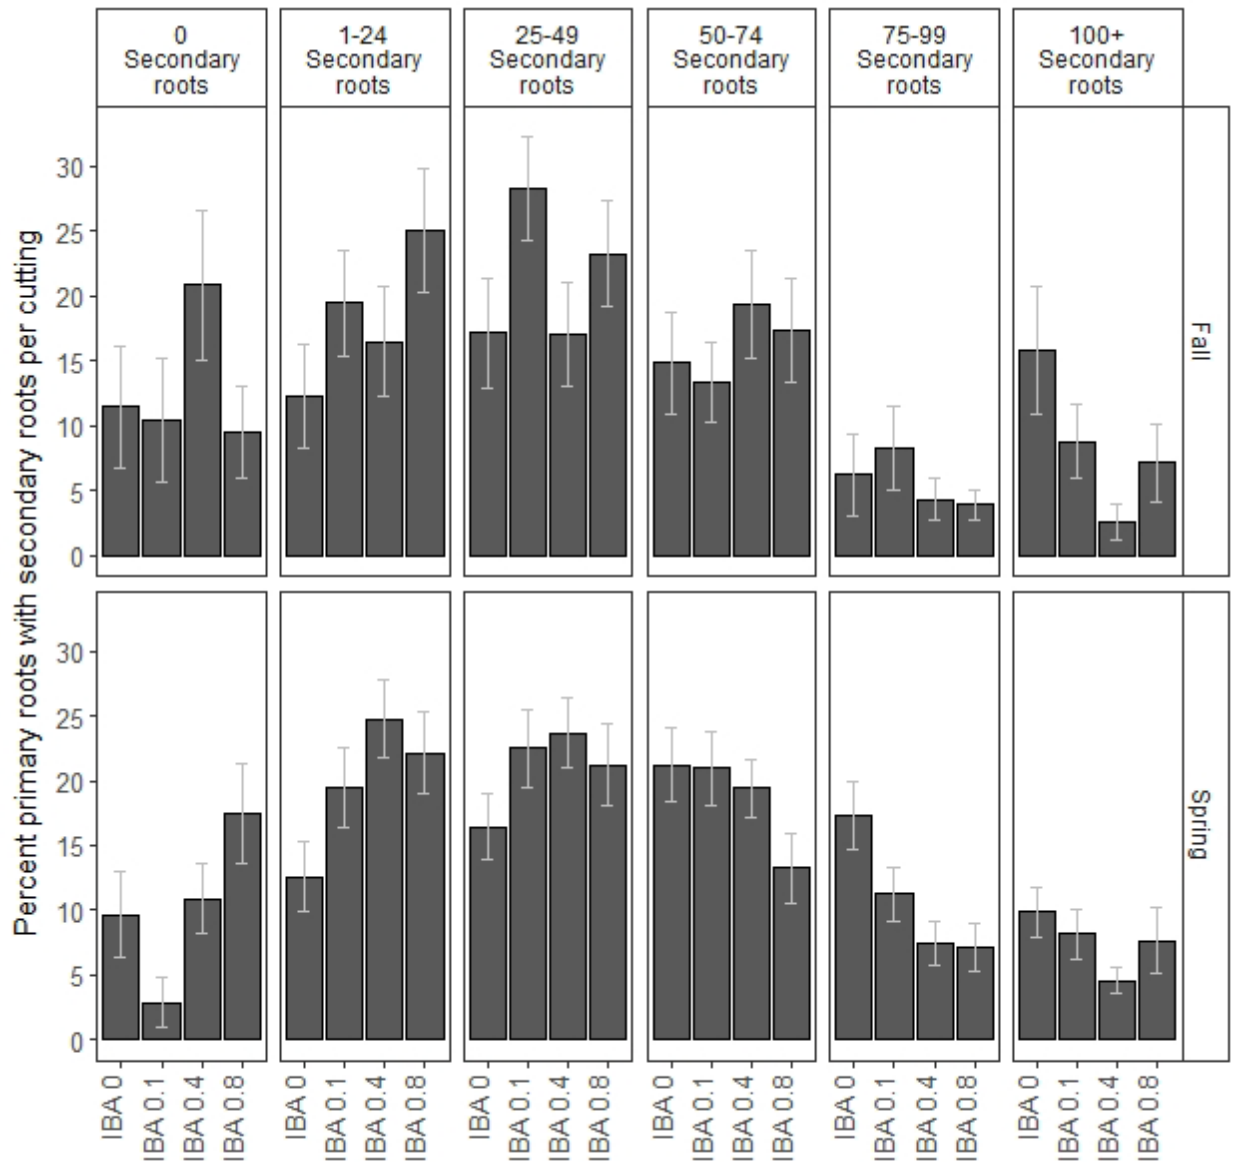

SM Figure 7: Percent of *Salix* ssp. cuttings with standard error in experiment 1 with secondary roots in different categories (vertical panels) by IBA concentration (%) (x axis) in different seasons (horizontal panels). Fall bars are n = 36 and spring bars are n = 54.

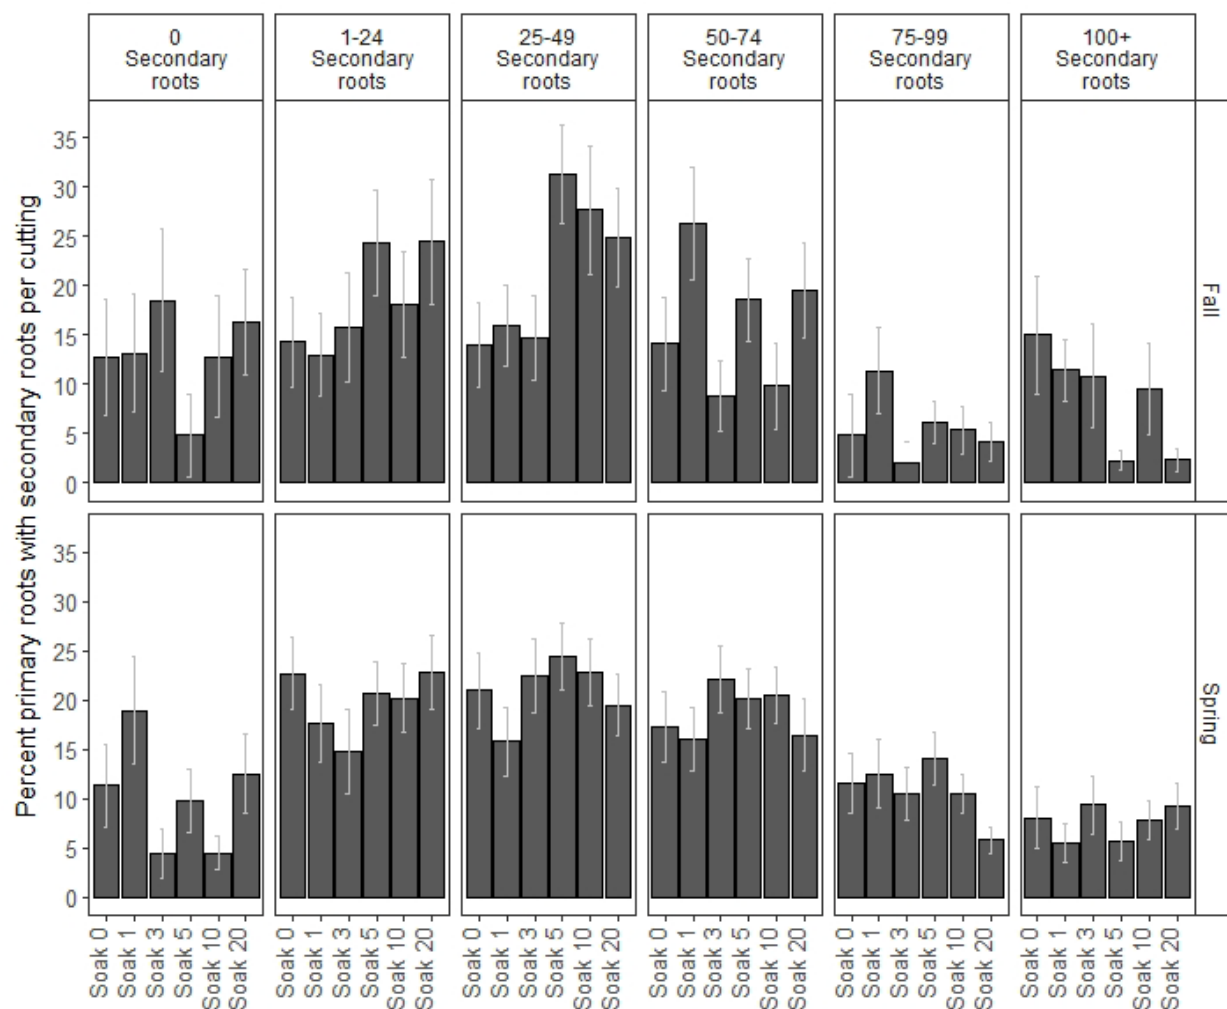

SM Figure 8: Percent of *Salix* ssp. cuttings with standard error in experiment 1 with secondary roots in different categories (vertical panels) by soaking time (days) (x axis) in different seasons (horizontal panels). Fall bars are n = 24 and spring bars are n = 36.
